# Supplementary material for: Current Status of “Watch-and-Wait” Rectal Cancer Treatment in Asia-Pacific Countries
Source: PubMed Central journal article supplement — Ann Coloproctol. 2020 Jan 31;36(2):70–7. doi: 10.3393/ac.2020.01.19 (PMC7299564; doi:10.3393/ac.2020.01.19), 2020-01-31
Supplement: ac-2020-01-19-app1.pdf [file ac-2020-01-19-app1.pdf]

**Appendix.** Questionnaire (Current Status of Watch-and-Wait Policy for Irradiated Rectal Cancer in Asia-Pacific Countries 2019 by APFCP)

Nationality: \_\_\_\_\_

Age:  30-39  40-49  50-59  60-69  >70Colorectal Surgeon:  Yes  NoAffiliation:  University or Tertiary Hospital  OthersHospital has a Department of Radiation Oncology:  Yes  No

Please tick each statement that you agree with:

1. Have you accepted the watch-and-wait policy?  
 Yes  No
2. Have you performed the watch-and-wait policy in clinical practice?  
 Yes  No
3. Have you explained the watch-and-wait option to your patient, if the patients who have received preoperative chemoradiotherapy (CRT) have a clinical complete response (CR)?  
 Yes  No
4. What is your preferred option in patients with clinically CR?  
 Watch-and-wait, always  
 Watch-and-wait, selectively (old age, poor general condition, etc.)  
 Radical surgery
5. (If you select 'No' in Question. 2) Why do you not perform the watch-and-wait policy in current practice? (check all)  
 Inaccuracy of the evaluation method (imaging study)  
 Lack of the evidence supporting the policy  
 Personal memory of failure the treatment  
 Legal issue  
 Lack of radiotherapy facility  
 Others: \_\_\_\_\_
6. (If you select 'No' in Question. 2) Do you plan to perform the watch-and-wait in future?  
 Yes  No
7. Which methods do you perform for restaging? (check all)  
 CT  
 MRI  
 Ultrasound  
 Sigmoidoscopy (with biopsy)  
 PET-CT  
 Others: \_\_\_\_\_
8. How many doses do you use for the CRT?  
 Less than 5,040 cGy  
 5,040 cGy  
 5,400 cGy  
 More than 5,400 cGy

9. Which chemotherapy regimen do you perform mostly?
- 5-FU
  - Capecitabine
  - Oxaliplatin
  - Others: \_\_\_\_\_
10. Do you use the chemotherapy in the resting period (the period between completion of CRT and the operation)?
- Yes  No
11. If you do (If you select 'Yes' in Question. 10), which regimen do you perform?
- Same regimen of CRT
  - Different regimen of CRT
  - Others: \_\_\_\_\_
12. When do you evaluate the CRT response after finishing the CRT?
- 4 Weeks
  - 6 Weeks
  - 8 Weeks
  - 10 Weeks
  - 12 Weeks
  - More than 12 weeks
13. After you perform a watch-and-wait, how often do you follow up?
- Every 1 months
  - Every 2 months
  - Every 3 months
  - Every 6 months
  - Others: \_\_\_\_\_
14. If you find a local regrowth in the patient who did a watch-and-wait, which management is preferred in your practice?
- Just wait and follow-up
  - Radical surgery
  - Chemotherapy
  - Re-do CRT
  - Proton therapy
  - Local excision
  - Others: \_\_\_\_\_
